# Supplementary material
Source: PubMed Central journal article supplement (PMC5749578)
Supplement: Supp_Fig1.pdf [file Supp_Fig1.pdf]

## Supplementary Data

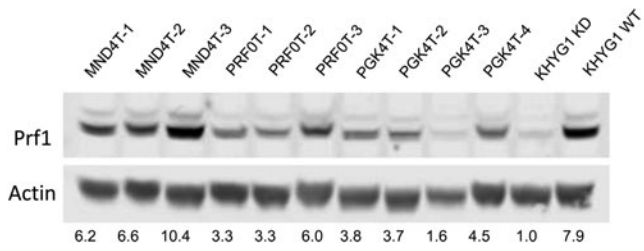

**Supplementary Figure S1.** Perforin protein expression in a human NK cell line. Western blot shows perforin expression in the KHYG1 NK cell line (KHYG1 WT) and perforin knockdown KHYG1 cell line (KHYG1 KD), and KHYG1 KD cells transduced with the MND4T, PGK4T, and PRF0T LV vectors. Expression was quantified after normalization with  $\beta$ -actin expression, and the fold increase in perforin protein over KHYD1 cells is denoted under each lane.

---
