# Supplementary material
Source: PubMed Central journal article supplement (PMC5749578)
Supplement: Supp_Fig3.pdf [file Supp_Fig3.pdf]

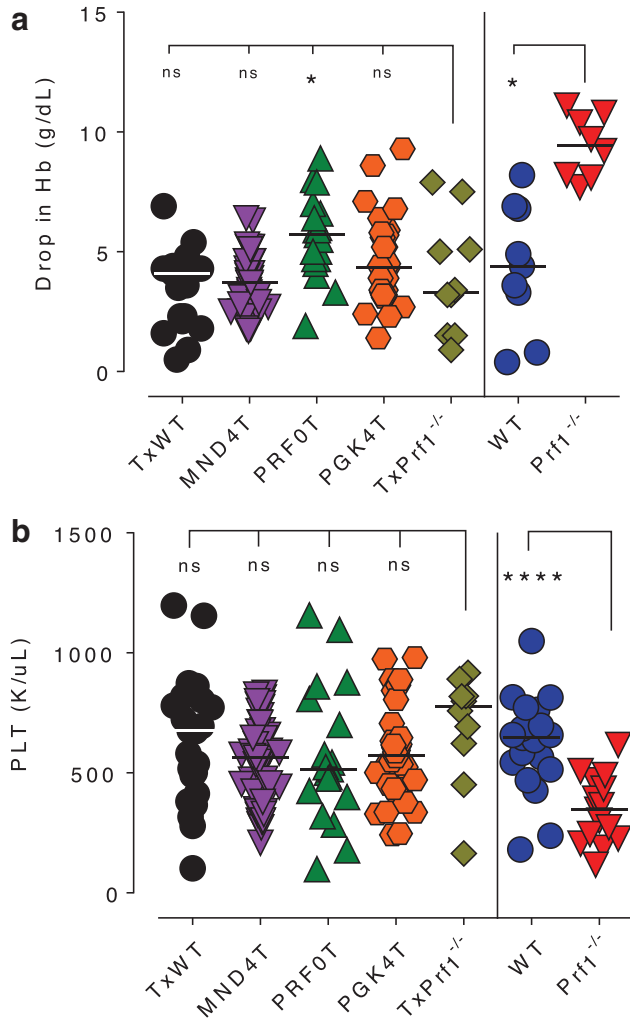

**Supplementary Figure S3.** Assessment of the degree of anemia and thrombocytopenia in peripheral blood 2 weeks after LCMV challenge. **(a)** The drop in hemoglobin (Hb) and **(b)** the overall platelet count 15 days after the LCMV challenge are shown. \* $p < 0.05$ , \*\*\*\* $p < 0.0001$ . Horizontal bars represent medians.
