# Supplementary material
Source: PubMed Central journal article supplement (PMC5749578)
Supplement: Supp_Fig4.pdf [file Supp_Fig4.pdf]

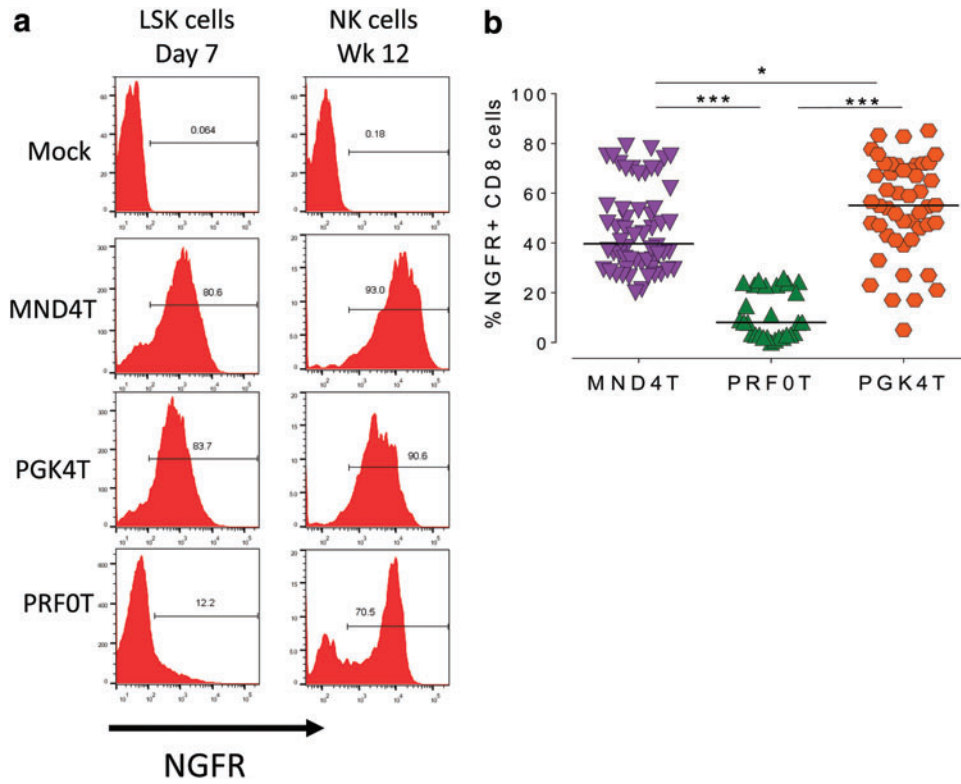

**Supplementary Figure S4.** Gene-modified chimerism in MND4T, PGK4T, and PRF0T mice. **(a)** Representative FACS plots representing gene transfer efficiency, as measured by tNGFR expression in LSK cells 7 days after LV vector transduction (left) and in NK cells of the same animals transplanted with these LSK cells 12 weeks posttransplantation (right). **(b)** tNGFR expression in resting peripheral blood CD8<sup>+</sup> T cells 12 weeks posttransplantation. \* $p < 0.05$ , \*\*\* $p < 0.001$ . Horizontal bars represent median tNGFR-expressing cells.
