# Supplementary material
Source: PubMed Central journal article supplement (PMC5749578)
Supplement: Supp_Fig5.pdf [file Supp_Fig5.pdf]

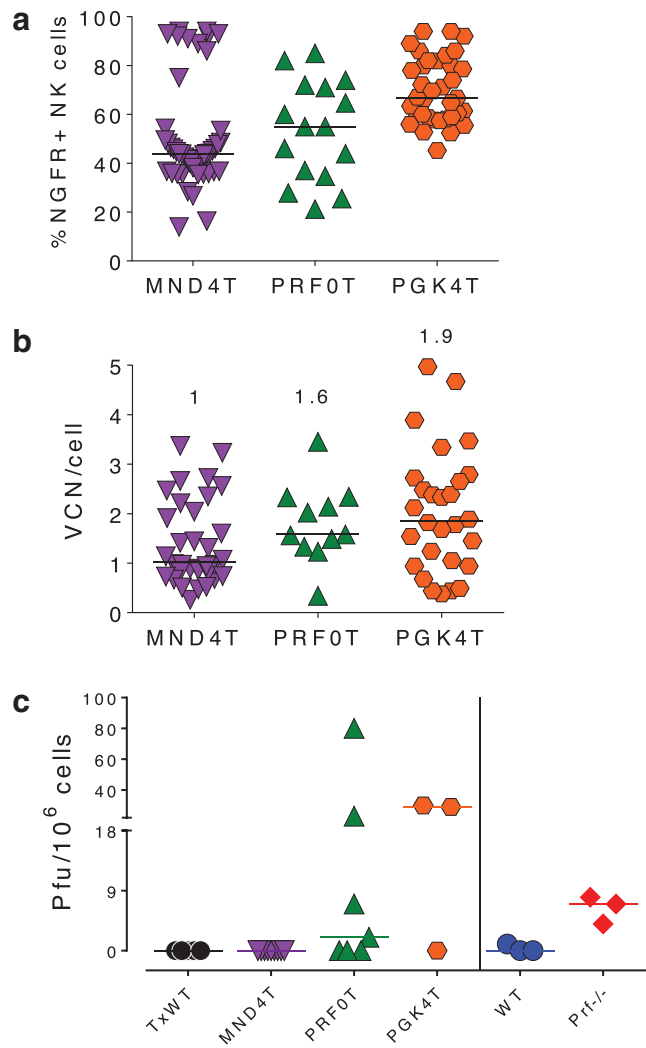

**Supplementary Figure S5.** Gene-modified NK cell chimerism and VCN in the subset of animals assessed for clinical scores and survival, and LCMV quantification in the mice in survival studies. **(a)** Gene-modified NK cell chimerism (% tNGFR-expressing NK cells) and **(b)** VCN 12 weeks posttransplantation in mice used for clinical scores and survival experiments. Median copy number is listed above each group. **(c)** LCMV plaque-forming units (pfu) per  $1 \times 10^6$  cells in bone marrow compared with on the day of sacrifice ( $n=3$  experiments). Horizontal bars represent medians.
